# Supplementary material
Source: PubMed Central journal article supplement (PMC3767509)
Supplement: 1302771110_pnas.201302771SI.pdf [file 1302771110_pnas.201302771SI.pdf]

# Supporting Information

DeVilbiss et al. 10.1073/pnas.1302771110

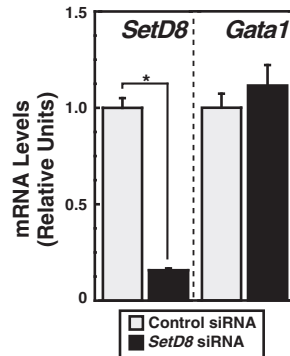

**Fig. S1.** Murine erythroleukemia (MEL) cells were transfected with histone lysine methyltransferase (SetD8) siRNA or control siRNA. *SetD8* and erythroid transcription factor (GATA-1) mRNA levels were quantified by RT-PCR ( $n = 3$ , mean  $\pm$  SE) \* $P < 0.0001$ .

| GATA-1-Repressed              |                |
|-------------------------------|----------------|
| Gene Name                     | ChIP-Seq Peaks |
| <i>Vim</i>                    | +              |
| <i>Limd2</i>                  | +              |
| <i>Clec10a</i>                | +              |
| <i>Myo1g</i>                  | +              |
| <i>Kank3</i>                  | +              |
| <i>Rgs19</i>                  | +              |
| <i>Apoc1</i>                  | +              |
| <i>Serpib2</i>                | -              |
| <i>Arap3</i>                  | +              |
| <i>Acaa2</i>                  | +              |
| <i>Tie6</i>                   | +              |
| <i>Cyba</i>                   | -              |
| <i>Lgals9</i>                 | +              |
| <i>Inf2</i>                   | +              |
| <i>Dbp</i>                    | +              |
| <i>Flot1</i>                  | +              |
| <i>Glipr1</i>                 | +              |
| <i>chr9:96664617-96683617</i> | +              |
| <i>Slc22a18</i>               | +              |
| <i>Rec8</i>                   | +              |
| <i>Bst2</i>                   | +              |
| <i>Alox5ap</i>                | +              |
| <i>Ephx2</i>                  | +              |
| <i>Nr2f6</i>                  | -              |
| <i>Tnfrsf18</i>               | +              |
| <i>Sla</i>                    | +              |
| <i>Snx21</i>                  | +              |
| <i>Cpped1</i>                 | +              |
| <i>Tbc1d10c</i>               | -              |

**Fig. S2.** GATA-1 occupancy at GATA-1/SetD8-corepressed genes in MEL cells. -, no GATA-1 peaks; +, GATA-1 occupancy in the gene body, promoter, or the surrounding chromatin.
